# Supplementary material for: Multi-omics analysis identifies Sphingomonas and specific metabolites as key biomarkers in elderly Chinese patients with coronary heart disease
Source: Front Microbiol. 2025 Apr 23;16:1452136. doi: 10.3389/fmicb.2025.1452136 (PMC12058083; doi:10.3389/fmicb.2025.1452136)
Supplement: Supplementary file 4 [file Table_1.XLSX]

## Sheet: Table S1
Patients	Age	sex	Height	Weight	BMI	Systolic_pressure	Diastolic_pressure	Heart_rate	Triglyceride	Total_cholesterol（mmol/L）	Low_density_lipoprotein(mmol/L)	High_density_lipoprotein(mmol/L)	Smoke	creatinine(umol/L)	Aspirin	Clopidogrel	Statins
Control	60	Man	169	71.6	25.06	131	80	77	1.13	5.69	3.76	1.27	1	85	0	1	1
Control	69	Woman	154	54.5	22.98	102	69	80	1.23	5.54	3.25	1.51	0	63	0	0	1
Control	67	Man	165	67	24.6	132	100	100	1.28	4.72	2.74	1.21	0	77	1	0	0
Control	71	Man	159	48.6	19.22	121	73	68	0.91	4.37	2.62	1.22	0	74	1	0	1
Control	72	Man	162	54.2	20.65	132	77	67	0.81	3.58	1.89	1.36	0	81	1	0	1
Control	70	Woman	159	59	23.33	136	75	78	5.53	5.84	2.36	1.01	0	58	1	0	1
Control	51	Man	180	90	27.77	156	90	72	1.13	3.28	1.86	0.96	1	75	1	0	1
Control	34	Man	172	80	27.04	132	88	95	/	/	/	/	0	61	1	0	1
Control	31	Woman	168	68	24.09	113	74	88	1.41	4.48	2.88	1.15	0	54	1	0	1
Control	63	Woman	160	57.6	22.5	147	75	81	2.4	4.87	3.11	0.93	0	58	1	0	1
Control	56	Man	169	76	26.6	161	88	89	0.67	3	1.59	1.13	0	75	0	0	1
Control	62	Man	162	71	27.05	152	87	73	0.91	2.69	1.56	0.78	0	84	0	0	1
Control	46	Man	157	63.3	25.68	120	58	78	0.84	3.62	2.48	0.88	0	75	0	0	1
Control	33	Man	173	56	18.71	143	95	81	0.92	3.13	1.6	1.12	0	86	1	0	1
Control	53	Man	170	64.6	22.35	124	93	75	2.2	3.53	2.05	0.85	1	94	0	0	1
Control	42	Man	159	52	20.56	111	76	89	1.67	4.24	2.7	0.82	0	94	1	0	1
Control	49	Woman	165	69.8	25.63	103	76	88	2.19	5.69	3.63	1.23	0	78	1	0	1
Control	58	Man	174	75	24.77	113	71	46	2.09	3.79	1.75	1.15	0	72	1	0	1
Control	48	Woman	153	47.1	20.12	134	82	86	1.62	4.21	2.38	1.16	0	59	0	0	1
Control	68	Woman	152	46	19.9	137	84	83	2.36	6.96	4.19	1.52	0	57	0	0	1
CHD	68	Man	165	62	22.77	147	86	63	1.33	3.27	1.41	1.3	0	106	1	0	1
CHD	54	Man	174	80	26.42	128	72	78	1.05	2.72	1.72	0.66	1	67	1	0	1
CHD	74	Woman	154	55	23.19	119	70	95	1.93	5.46	3.56	0.87	0	77	1	0	1
CHD	72	Woman	151	52.1	22.84	134	67	64	1.11	3.62	1.91	1.14	0	55	1	0	1
CHD	74	Woman	160	54	21.09	166	94	63	1.02	2.42	0.86	1.27	0	60	0	1	1
CHD	68	Woman	157	55	22.31	109	73	87	1.14	2.83	1.31	1.16	0	47	1	0	1
CHD	36	Man	157	71	28.8	110	70	78	0.7	4.42	3.02	1.17	0	80	1	1	1
CHD	56	Woman	156	61.7	25.35	156	86	62	1.58	3.88	2.32	1.14	0	57	1	0	1
CHD	62	Man	170	78.8	27.26	121	78	66	1.35	3.17	1.63	1.21	0	103	1	0	1
CHD	79	Man	167	92.5	33.16	156	80	63	1.68	4.24	2.62	1.09	0	91	1	1	1
CHD	57	Man	175	72.5	23.67	126	75	73	1.42	3.44	2.17	0.82	1	57	1	0	1
CHD	48	Man	164	83.9	31.19	143	90	95	1.35	3.33	1.92	0.98	1	60	1	0	1
CHD	41	Man	163	69.6	26.19	148	84	65	2.07	3.32	1.92	0.7	1	83	1	0	1
CHD	43	Man	172	80	27.04	118	83	88	1.34	2.37	1.44	0.51	1	77	1	0	1
CHD	64	Man	160	68	26.56	111	72	54	1.51	2.81	1.53	0.79	0	96	1	0	1
CHD	57	Man	164	64.2	23.86	153	83	69	1.5	3.58	2.13	0.93	1	83	1	0	1
CHD	70	Man	164	76.9	28.59	146	75	70	0.62	2.72	1.18	1.2	1	77	1	0	1
CHD	69	Man	172	61	20.61	92	57	65	1.09	2.25	1.17	0.66	0	70	0	1	1
CHD	76	Woman	156	51	20.95	145	64	64	1.5	4.21	2.57	1.12	0	83	1	1	1
CHD	55	Man	170	75	25.95	137	87	78	0.76	4.07	2.87	0.82	1	87	1	1	1

## Sheet: Table S2
	Total	Hits	Raw p	-log(p)	Holm adjust	FDR	Impact	compounds	pathway	links
Non-alcoholic fatty liver disease	2	1	0.09118	2.3949	1	0.8419	0.5	C00031	hsa04932	http://www.kegg.jp/pathway/hsa04932+C00031%09red
Central carbon metabolism in cancer	37	14	3.13e-10	21.884	8.68e-08	8.68e-08	0.35849	C00026;C00031;C00036;C00064;C00079;C00082;C00123;C00135;C00152;C00158;C00183;C00311;C00354;C00407	hsa05230	http://www.kegg.jp/pathway/hsa05230+C00026%09red+C00031%09red+C00036%09red+C00064%09blue+C00079%09red+C00082%09red+C00123%09red+C00135%09blue+C00152%09red+C00158%09blue+C00183%09red+C00311%09red+C00354%09blue+C00407%09red
Valine, leucine and isoleucine biosynthesis	23	6	0.00048897	7.6232	0.13349	0.025157	0.35484	C00109;C00123;C00183;C00188;C00407;C02504	hsa00290	http://www.kegg.jp/pathway/hsa00290+C00109%09blue+C00123%09red+C00183%09red+C00188%09blue+C00407%09red+C02504%09red
Choline metabolism in cancer	11	2	0.0903	2.4046	1	0.8419	0.32584	C00114;C00670	hsa05231	http://www.kegg.jp/pathway/hsa05231+C00114%09red+C00670%09red
GABAergic synapse	9	2	0.062799	2.7678	1	0.75631	0.29412	C00026;C00064	hsa04727	http://www.kegg.jp/pathway/hsa04727+C00026%09red+C00064%09blue
D-Glutamine and D-glutamate metabolism	13	3	0.020192	3.9025	1	0.32901	0.28571	C00026;C00064;C02237	hsa00471	http://www.kegg.jp/pathway/hsa00471+C00026%09red+C00064%09blue+C02237%09red
Apoptosis	4	1	0.1741	1.7481	1	1	0.25	C00319	hsa04210	http://www.kegg.jp/pathway/hsa04210+C00319%09blue
mTOR signaling pathway	4	1	0.1741	1.7481	1	1	0.25	C00123	hsa04150	http://www.kegg.jp/pathway/hsa04150+C00123%09red
Insulin signaling pathway	4	1	0.1741	1.7481	1	1	0.25	C00031	hsa04910	http://www.kegg.jp/pathway/hsa04910+C00031%09red
Sphingolipid signaling pathway	15	2	0.15294	1.8777	1	1	0.24138	C00319;C00346	hsa04071	http://www.kegg.jp/pathway/hsa04071+C00319%09blue+C00346%09blue
Mineral absorption	29	8	3.49e-05	10.262	0.0096387	0.0039416	0.22857	C00031;C00064;C00079;C00123;C00152;C00183;C00188;C00407	hsa04978	http://www.kegg.jp/pathway/hsa04978+C00031%09red+C00064%09blue+C00079%09red+C00123%09red+C00152%09red+C00183%09red+C00188%09blue+C00407%09red
Riboflavin metabolism	20	2	0.23898	1.4314	1	1	0.21429	C00061;C00474	hsa00740	http://www.kegg.jp/pathway/hsa00740+C00061%09red+C00474%09red
Protein digestion and absorption	47	10	4.27e-05	10.062	0.011739	0.0039416	0.21277	C00064;C00079;C00082;C00123;C00135;C00152;C00183;C00188;C00407;C00491	hsa04974	http://www.kegg.jp/pathway/hsa04974+C00064%09blue+C00079%09red+C00082%09red+C00123%09red+C00135%09blue+C00152%09red+C00183%09red+C00188%09blue+C00407%09red+C00491%09red
Phenylalanine, tyrosine and tryptophan biosynthesis	34	6	0.0042554	5.4596	1	0.10716	0.21053	C00079;C00082;C00354;C00441;C02637;C03506	hsa00400	http://www.kegg.jp/pathway/hsa00400+C00079%09red+C00082%09red+C00354%09blue+C00441%09blue+C02637%09blue+C03506%09blue
Prolactin signaling pathway	11	2	0.0903	2.4046	1	0.8419	0.21053	C00031;C00082	hsa04917	http://www.kegg.jp/pathway/hsa04917+C00031%09red+C00082%09red
Arginine biosynthesis	23	3	0.089188	2.417	1	0.8419	0.20755	C00026;C00064;C00327	hsa00220	http://www.kegg.jp/pathway/hsa00220+C00026%09red+C00064%09blue+C00327%09blue
FoxO signaling pathway	5	1	0.21269	1.5479	1	1	0.2	C00031	hsa04068	http://www.kegg.jp/pathway/hsa04068+C00031%09red
Glutamatergic synapse	8	1	0.31804	1.1456	1	1	0.2	C00064	hsa04724	http://www.kegg.jp/pathway/hsa04724+C00064%09blue
Phototransduction	8	1	0.31804	1.1456	1	1	0.2	C00144	hsa04744	http://www.kegg.jp/pathway/hsa04744+C00144%09red
Alanine, aspartate and glutamate metabolism	28	5	0.0085311	4.764	1	0.15754	0.19886	C00026;C00036;C00064;C00152;C00158	hsa00250	http://www.kegg.jp/pathway/hsa00250+C00026%09red+C00036%09red+C00064%09blue+C00152%09red+C00158%09blue
Phenylalanine metabolism	60	8	0.0060696	5.1045	1	0.14011	0.18293	C00079;C00082;C00642;C01198;C04148;C05332;C05593;C07086	hsa00360	http://www.kegg.jp/pathway/hsa00360+C00079%09red+C00082%09red+C00642%09blue+C01198%09blue+C04148%09red+C05332%09red+C05593%09red+C07086%09blue
Glucagon signaling pathway	26	6	0.00099256	6.9152	0.26898	0.039277	0.18182	C00026;C00031;C00036;C00158;C00311;C00354	hsa04922	http://www.kegg.jp/pathway/hsa04922+C00026%09red+C00031%09red+C00036%09red+C00158%09blue+C00311%09red+C00354%09blue
Citrate cycle (TCA cycle)	20	5	0.00182	6.3089	0.48959	0.056016	0.17778	C00026;C00036;C00158;C00311;C00417	hsa00020	http://www.kegg.jp/pathway/hsa00020+C00026%09red+C00036%09red+C00158%09blue+C00311%09red+C00417%09red
Taurine and hypotaurine metabolism	22	3	0.080188	2.5234	1	0.8419	0.17647	C00026;C00227;C00245	hsa00430	http://www.kegg.jp/pathway/hsa00430+C00026%09red+C00227%09red+C00245%09blue
Proximal tubule bicarbonate reclamation	17	4	0.0067451	4.9989	1	0.14372	0.16814	C00026;C00036;C00064;C00267	hsa04964	http://www.kegg.jp/pathway/hsa04964+C00026%09red+C00036%09red+C00064%09blue+C00267%09blue
AMPK signaling pathway	22	3	0.080188	2.5234	1	0.8419	0.16667	C00031;C00354;C07151	hsa04152	http://www.kegg.jp/pathway/hsa04152+C00031%09red+C00354%09blue+C07151%09blue
Type II diabetes mellitus	6	1	0.24949	1.3883	1	1	0.16667	C00031	hsa04930	http://www.kegg.jp/pathway/hsa04930+C00031%09red
Melanogenesis	6	1	0.24949	1.3883	1	1	0.16667	C00082	hsa04916	http://www.kegg.jp/pathway/hsa04916+C00082%09red
Olfactory transduction	8	1	0.31804	1.1456	1	1	0.16667	C00144	hsa04740	http://www.kegg.jp/pathway/hsa04740+C00144%09red
Cholinergic synapse	12	1	0.43704	0.82774	1	1	0.16667	C00114	hsa04725	http://www.kegg.jp/pathway/hsa04725+C00114%09red
Aminoacyl-tRNA biosynthesis	52	9	0.00054491	7.5149	0.14821	0.025157	0.16071	C00064;C00079;C00082;C00123;C00135;C00152;C00183;C00188;C00407	hsa00970	http://www.kegg.jp/pathway/hsa00970+C00064%09blue+C00079%09red+C00082%09red+C00123%09red+C00135%09blue+C00152%09red+C00183%09red+C00188%09blue+C00407%09red
HIF-1 signaling pathway	15	3	0.030004	3.5064	1	0.41556	0.15789	C00026;C00031;C00072	hsa04066	http://www.kegg.jp/pathway/hsa04066+C00026%09red+C00031%09red+C00072%09blue
Lysine degradation	50	4	0.20304	1.5944	1	1	0.15584	C00026;C00449;C00956;C02727	hsa00310	http://www.kegg.jp/pathway/hsa00310+C00026%09red+C00449%09blue+C00956%09red+C02727%09red
Insulin secretion	12	1	0.43704	0.82774	1	1	0.15	C00031	hsa04911	http://www.kegg.jp/pathway/hsa04911+C00031%09red
Vitamin B6 metabolism	29	3	0.1509	1.8912	1	1	0.14925	C00064;C00534;C00847	hsa00750	http://www.kegg.jp/pathway/hsa00750+C00064%09blue+C00534%09red+C00847%09red
Nicotine addiction	7	1	0.28458	1.2567	1	1	0.14286	C00745	hsa05033	http://www.kegg.jp/pathway/hsa05033+C00745%09blue
cGMP-PKG signaling pathway	10	1	0.38037	0.96661	1	1	0.14286	C00144	hsa04022	http://www.kegg.jp/pathway/hsa04022+C00144%09red
beta-Alanine metabolism	32	6	0.0030973	5.7772	0.83007	0.085794	0.12931	C00135;C00315;C00429;C00864;C03722;C05669	hsa00410	http://www.kegg.jp/pathway/hsa00410+C00135%09blue+C00315%09blue+C00429%09blue+C00864%09red+C03722%09blue+C05669%09blue
Glycerophospholipid metabolism	52	3	0.44076	0.81924	1	1	0.12593	C00114;C00346;C00670	hsa00564	http://www.kegg.jp/pathway/hsa00564+C00114%09red+C00346%09blue+C00670%09red
Longevity regulating pathway	8	1	0.31804	1.1456	1	1	0.125	C07151	hsa04211	http://www.kegg.jp/pathway/hsa04211+C07151%09blue
ABC transporters	138	17	0.00017591	8.6455	0.048199	0.012182	0.12319	C00031;C00064;C00079;C00114;C00123;C00135;C00137;C00183;C00188;C00245;C00299;C00315;C00407;C00491;C00503;C01083;C03619	hsa02010	http://www.kegg.jp/pathway/hsa02010+C00031%09red+C00064%09blue+C00079%09red+C00114%09red+C00123%09red+C00135%09blue+C00137%09red+C00183%09red+C00188%09blue+C00245%09blue+C00299%09red+C00315%09blue+C00407%09red+C00491%09red+C00503%09red+C01083%09blue+C03619%09red
Glyoxylate and dicarboxylate metabolism	62	8	0.0074121	4.9046	1	0.14665	0.11795	C00026;C00036;C00064;C00158;C00311;C00417;C00988;C01732	hsa00630	http://www.kegg.jp/pathway/hsa00630+C00026%09red+C00036%09red+C00064%09blue+C00158%09blue+C00311%09red+C00417%09red+C00988%09blue+C01732%09red
Ferroptosis	29	2	0.39543	0.92778	1	1	0.11628	C00491;C00669	hsa04216	http://www.kegg.jp/pathway/hsa04216+C00491%09red+C00669%09red
Pantothenate and CoA biosynthesis	30	3	0.16226	1.8185	1	1	0.11607	C00183;C00429;C00864	hsa00770	http://www.kegg.jp/pathway/hsa00770+C00183%09red+C00429%09blue+C00864%09red
Pyrimidine metabolism	65	4	0.36043	1.0205	1	1	0.11578	C00064;C00299;C00337;C00429	hsa00240	http://www.kegg.jp/pathway/hsa00240+C00064%09blue+C00299%09red+C00337%09red+C00429%09blue
Purine metabolism	95	4	0.65589	0.42176	1	1	0.11497	C00064;C00144;C00366;C00385	hsa00230	http://www.kegg.jp/pathway/hsa00230+C00064%09blue+C00144%09red+C00366%09red+C00385%09red
Cholesterol metabolism	10	2	0.07615	2.575	1	0.8419	0.11111	C01921;C05466	hsa04979	http://www.kegg.jp/pathway/hsa04979+C01921%09blue+C05466%09red
AGE-RAGE signaling pathway in diabetic complications	9	1	0.34995	1.05	1	1	0.11111	C00031	hsa04933	http://www.kegg.jp/pathway/hsa04933+C00031%09red
Bile secretion	97	12	0.0015814	6.4494	0.42698	0.054756	0.11009	C00026;C00031;C00114;C00315;C00366;C00486;C00504;C01921;C04483;C04555;C05466;C07151	hsa04976	http://www.kegg.jp/pathway/hsa04976+C00026%09red+C00031%09red+C00114%09red+C00315%09blue+C00366%09red+C00486%09red+C00504%09blue+C01921%09blue+C04483%09blue+C04555%09blue+C05466%09red+C07151%09blue
Sphingolipid metabolism	25	2	0.32692	1.118	1	1	0.10959	C00319;C00346	hsa00600	http://www.kegg.jp/pathway/hsa00600+C00319%09blue+C00346%09blue
Vitamin digestion and absorption	39	5	0.033151	3.4067	1	0.43728	0.10204	C00061;C00072;C00504;C00534;C00864	hsa04977	http://www.kegg.jp/pathway/hsa04977+C00061%09red+C00072%09blue+C00504%09blue+C00534%09red+C00864%09red
Glutathione metabolism	38	4	0.098659	2.3161	1	0.88156	0.1014	C00072;C00315;C00669;C03740	hsa00480	http://www.kegg.jp/pathway/hsa00480+C00072%09blue+C00315%09blue+C00669%09red+C03740%09red
Cysteine and methionine metabolism	63	7	0.025895	3.6537	1	0.39733	0.096606	C00109;C00170;C00441;C00491;C01118;C03145;C08276	hsa00270	http://www.kegg.jp/pathway/hsa00270+C00109%09blue+C00170%09red+C00441%09blue+C00491%09red+C01118%09red+C03145%09red+C08276%09red
Tyrosine metabolism	78	9	0.0095654	4.6496	1	0.1656	0.096	C00082;C00530;C00642;C00811;C01384;C03765;C05593;C05594;C10447	hsa00350	http://www.kegg.jp/pathway/hsa00350+C00082%09red+C00530%09blue+C00642%09blue+C00811%09red+C01384%09red+C03765%09red+C05593%09red+C05594%09red+C10447%09red
Histidine metabolism	47	3	0.37707	0.97533	1	1	0.096	C00026;C00135;C03277	hsa00340	http://www.kegg.jp/pathway/hsa00340+C00026%09red+C00135%09blue+C03277%09red
Primary bile acid biosynthesis	47	3	0.37707	0.97533	1	1	0.095694	C00245;C01921;C05466	hsa00120	http://www.kegg.jp/pathway/hsa00120+C00245%09blue+C01921%09blue+C05466%09red
Shigellosis	14	2	0.13655	1.9911	1	1	0.090909	C00123;C00407	hsa05131	http://www.kegg.jp/pathway/hsa05131+C00123%09red+C00407%09red
Cocaine addiction	7	1	0.28458	1.2567	1	1	0.090909	C00082	hsa05030	http://www.kegg.jp/pathway/hsa05030+C00082%09red
Galactose metabolism	46	3	0.36413	1.0103	1	1	0.087302	C00031;C00137;C00267	hsa00052	http://www.kegg.jp/pathway/hsa00052+C00031%09red+C00137%09red+C00267%09blue
Necroptosis	10	1	0.38037	0.96661	1	1	0.083333	C00319	hsa04217	http://www.kegg.jp/pathway/hsa04217+C00319%09blue
Insulin resistance	20	1	0.61663	0.48349	1	1	0.083333	C00031	hsa04931	http://www.kegg.jp/pathway/hsa04931+C00031%09red
Arginine and proline metabolism	78	6	0.15453	1.8674	1	1	0.080882	C00300;C00315;C00441;C00791;C01035;C02946	hsa00330	http://www.kegg.jp/pathway/hsa00330+C00300%09red+C00315%09blue+C00441%09blue+C00791%09red+C01035%09red+C02946%09blue
Linoleic acid metabolism	28	3	0.1398	1.9675	1	1	0.078947	C14827;C14828;C14833	hsa00591	http://www.kegg.jp/pathway/hsa00591+C14827%09red+C14828%09red+C14833%09blue
Taste transduction	32	3	0.18572	1.6835	1	1	0.078947	C00031;C00144;C00158	hsa04742	http://www.kegg.jp/pathway/hsa04742+C00031%09red+C00144%09red+C00158%09blue
Amphetamine addiction	9	1	0.34995	1.05	1	1	0.076923	C00082	hsa05031	http://www.kegg.jp/pathway/hsa05031+C00082%09red
Prostate cancer	11	1	0.40938	0.89312	1	1	0.076923	C01227	hsa05215	http://www.kegg.jp/pathway/hsa05215+C01227%09blue
Ascorbate and aldarate metabolism	50	4	0.20304	1.5944	1	1	0.071429	C00026;C00072;C00137;C01620	hsa00053	http://www.kegg.jp/pathway/hsa00053+C00026%09red+C00072%09blue+C00137%09red+C01620%09blue
Alcoholism	10	1	0.38037	0.96661	1	1	0.071429	C00082	hsa05034	http://www.kegg.jp/pathway/hsa05034+C00082%09red
Carbohydrate digestion and absorption	27	1	0.7263	0.31979	1	1	0.068966	C00031	hsa04973	http://www.kegg.jp/pathway/hsa04973+C00031%09red
Glycine, serine and threonine metabolism	50	6	0.027254	3.6026	1	0.39733	0.067881	C00109;C00114;C00188;C00300;C00441;C03508	hsa00260	http://www.kegg.jp/pathway/hsa00260+C00109%09blue+C00114%09red+C00188%09blue+C00300%09red+C00441%09blue+C03508%09red
One carbon pool by folate	9	1	0.34995	1.05	1	1	0.067797	C00504	hsa00670	http://www.kegg.jp/pathway/hsa00670+C00504%09blue
Pyruvate metabolism	31	4	0.05386	2.9214	1	0.67815	0.061224	C00036;C00227;C02504;C05994	hsa00620	http://www.kegg.jp/pathway/hsa00620+C00036%09red+C00227%09red+C02504%09red+C05994%09red
Butanoate metabolism	42	2	0.59111	0.52575	1	1	0.058824	C00026;C01384	hsa00650	http://www.kegg.jp/pathway/hsa00650+C00026%09red+C01384%09red
Starch and sucrose metabolism	37	2	0.5216	0.65086	1	1	0.057851	C00031;C01083	hsa00500	http://www.kegg.jp/pathway/hsa00500+C00031%09red+C01083%09blue
Sulfur metabolism	33	3	0.19777	1.6207	1	1	0.054545	C00245;C01118;C08276	hsa00920	http://www.kegg.jp/pathway/hsa00920+C00245%09blue+C01118%09red+C08276%09red
Glycolysis / Gluconeogenesis	31	3	0.17388	1.7494	1	1	0.053942	C00031;C00036;C00267	hsa00010	http://www.kegg.jp/pathway/hsa00010+C00031%09red+C00036%09red+C00267%09blue
Propanoate metabolism	48	1	0.90084	0.10442	1	1	0.053846	C00109	hsa00640	http://www.kegg.jp/pathway/hsa00640+C00109%09blue
Oxidative phosphorylation	16	1	0.53538	0.62479	1	1	0.05	C00061	hsa00190	http://www.kegg.jp/pathway/hsa00190+C00061%09red
Valine, leucine and isoleucine degradation	42	3	0.3121	1.1644	1	1	0.049407	C00123;C00183;C00407	hsa00280	http://www.kegg.jp/pathway/hsa00280+C00123%09red+C00183%09red+C00407%09red
Neomycin, kanamycin and gentamicin biosynthesis	81	3	0.73839	0.30328	1	1	0.048193	C00031;C00397;C17702	hsa00524	http://www.kegg.jp/pathway/hsa00524+C00031%09red+C00397%09blue+C17702%09blue
Dopaminergic synapse	12	1	0.43704	0.82774	1	1	0.045455	C00082	hsa04728	http://www.kegg.jp/pathway/hsa04728+C00082%09red
Ovarian steroidogenesis	24	1	0.68375	0.38017	1	1	0.045455	C01227	hsa04913	http://www.kegg.jp/pathway/hsa04913+C01227%09blue
Pentose phosphate pathway	35	2	0.49168	0.70992	1	1	0.044776	C00031;C00257	hsa00030	http://www.kegg.jp/pathway/hsa00030+C00031%09red+C00257%09blue
Nicotinate and nicotinamide metabolism	55	2	0.73606	0.30644	1	1	0.037209	C01384;C03722	hsa00760	http://www.kegg.jp/pathway/hsa00760+C01384%09red+C03722%09blue
Inositol phosphate metabolism	47	1	0.89592	0.10991	1	1	0.035629	C00137	hsa00562	http://www.kegg.jp/pathway/hsa00562+C00137%09red
Phosphatidylinositol signaling system	29	1	0.75146	0.28574	1	1	0.035115	C00137	hsa04070	http://www.kegg.jp/pathway/hsa04070+C00137%09red
Caffeine metabolism	22	1	0.65179	0.42803	1	1	0.03125	C00385	hsa00232	http://www.kegg.jp/pathway/hsa00232+C00385%09red
Biosynthesis of unsaturated fatty acids	74	2	0.86841	0.14109	1	1	0.03125	C00249;C08316	hsa01040	http://www.kegg.jp/pathway/hsa01040+C00249%09blue+C08316%09blue
Nitrogen metabolism	19	1	0.59775	0.51459	1	1	0.030303	C00064	hsa00910	http://www.kegg.jp/pathway/hsa00910+C00064%09blue
Parkinson disease	21	1	0.63463	0.45471	1	1	0.030303	C00082	hsa05012	http://www.kegg.jp/pathway/hsa05012+C00082%09red
Pathways in cancer	31	1	0.77431	0.25578	1	1	0.030303	C01227	hsa05200	http://www.kegg.jp/pathway/hsa05200+C01227%09blue
Amino sugar and nucleotide sugar metabolism	108	3	0.88863	0.11808	1	1	0.027586	C00031;C00267;C00329	hsa00520	http://www.kegg.jp/pathway/hsa00520+C00031%09red+C00267%09blue+C00329%09red
Steroid hormone biosynthesis	99	2	0.95085	0.0504	1	1	0.02589	C01227;C04555	hsa00140	http://www.kegg.jp/pathway/hsa00140+C01227%09blue+C04555%09blue
Pentose and glucuronate interconversions	56	3	0.4899	0.71355	1	1	0.025862	C00026;C00474;C03826	hsa00040	http://www.kegg.jp/pathway/hsa00040+C00026%09red+C00474%09red+C03826%09blue
Thermogenesis	23	1	0.66815	0.40324	1	1	0.025641	C00745	hsa04714	http://www.kegg.jp/pathway/hsa04714+C00745%09blue
Ether lipid metabolism	25	1	0.69862	0.35865	1	1	0.024096	C00670	hsa00565	http://www.kegg.jp/pathway/hsa00565+C00670%09red
Fructose and mannose metabolism	54	2	0.72667	0.31928	1	1	0.023438	C00267;C11544	hsa00051	http://www.kegg.jp/pathway/hsa00051+C00267%09blue+C11544%09red
Thiamine metabolism	31	1	0.77431	0.25578	1	1	0.022222	C00082	hsa00730	http://www.kegg.jp/pathway/hsa00730+C00082%09red
Fatty acid biosynthesis	58	2	0.76261	0.271	1	1	0.020038	C00249;C01571	hsa00061	http://www.kegg.jp/pathway/hsa00061+C00249%09blue+C01571%09red
Neuroactive ligand-receptor interaction	52	1	0.91834	0.085187	1	1	0.019231	C00245	hsa04080	http://www.kegg.jp/pathway/hsa04080+C00245%09blue
Ubiquinone and other terpenoid-quinone biosynthesis	92	2	0.93483	0.067388	1	1	0.01875	C00082;C00811	hsa00130	http://www.kegg.jp/pathway/hsa00130+C00082%09red+C00811%09red
alpha-Linolenic acid metabolism	44	1	0.87962	0.12826	1	1	0.015152	C04785	hsa00592	http://www.kegg.jp/pathway/hsa00592+C04785%09blue
Folate biosynthesis	58	1	0.939	0.06294	1	1	0.014423	C00504	hsa00790	http://www.kegg.jp/pathway/hsa00790+C00504%09blue
Porphyrin and chlorophyll metabolism	142	3	0.96668	0.033885	1	1	0.013725	C00188;C00486;C00500	hsa00860	http://www.kegg.jp/pathway/hsa00860+C00188%09blue+C00486%09red+C00500%09red
Fatty acid degradation	50	1	0.91001	0.094296	1	1	0.0090909	C00249	hsa00071	http://www.kegg.jp/pathway/hsa00071+C00249%09blue
Drug metabolism - cytochrome P450	87	1	0.98522	0.01489	1	1	0.008547	C07073	hsa00982	http://www.kegg.jp/pathway/hsa00982+C07073%09red
Tryptophan metabolism	83	2	0.90699	0.097627	1	1	0.0060423	C03722;C08313	hsa00380	http://www.kegg.jp/pathway/hsa00380+C03722%09blue+C08313%09red
Fatty acid elongation	40	1	0.8539	0.15794	1	1	0.0054348	C00249	hsa00062	http://www.kegg.jp/pathway/hsa00062+C00249%09blue
Metabolism of xenobiotics by cytochrome P450	121	1	0.99724	0.002762	1	1	0.0039841	C00745	hsa00980	http://www.kegg.jp/pathway/hsa00980+C00745%09blue
